# Supplementary material for: Unveiling the mental state: validating the uBioMacpa Pro stress measurement tool among Chinese college students
Source: PeerJ. 2025 Aug 8;13:e19830. doi: 10.7717/peerj.19830 (PMC12338056; doi:10.7717/peerj.19830)
Supplement: Supplemental Information 1 [file peerj-13-19830-s001.xlsx]

## Sheet: Concurrent Validity
ID	CSSCS	UBiomacpapro
1	46	47
2	7	32
3	46	21
4	36	28
5	52	46
6	12	34
7	23	45
8	45	37
9	25	47
10	43	39
11	46	57
12	22	28
13	25	31
14	25	43
15	46	13
16	28	36
17	39	37
18	26	39
19	38	14
20	48	64
21	39	24
22	24	34
23	26	45
24	21	42
25	26	57
26	27	39
27	30	26
28	27	32
29	38	32
30	8	28
31	20	34
32	34	45
33	54	38
34	34	36
35	42	42
36	34	36
37	24	49
38	28	26
39	32	24
40	36	33
41	36	48
42	32	26
43	24	28
44	32	42
45	24	26
46	38	42
47	21	36
48	35	22
49	54	42
50	36	48
51	30	35
52	28	31
53	24	46
54	28	31
55	26	20
56	18	52
57	37	32
58	36	29
59	42	19
60	36	22
61	34	32
62	35	47
63	22	41
64	47	50
65	30	32
66	39	34
67	15	47
68	50	58
69	37	37
70	24	28
71	28	30
72	35	38
73	21	31
74	28	44
75	34	45
76	18	42
77	27	23
78	48	25
79	29	28
80	35	24
81	41	38
82	25	30
83	37	23
84	35	33
85	27	30
86	32	34
87	29	37
88	22	36
89	45	42
90	32	36
91	28	30
92	32	36
93	20	46
94	28	32
95	32	32
96	21	38
97	34	19
98	49	51
99	4	23
100	7	42
101	4	31
102	30	34
103	44	45
104	17	45
105	20	37
106	7	36
107	45	39
108	36	43
109	51	26
110	20	34
111	29	35
112	32	45
113	38	38
114	21	27
115	46	50
116	20	37
117	37	34
118	27	37
119	31	39
120	45	39
121	42	32
122	6	32
123	5	19
124	22	36
125	29	37
126	19	39
127	31	38
128	26	41
129	46	50
130	6	33
131	28	34
132	20	32
133	36	32
134	39	39
135	33	43
136	18	47
137	22	34
138	27	33
139	23	43
140	40	45
141	35	44
142	47	43
143	38	25
144	47	51
145	32	35
146	6	34
147	27	35
148	34	37
149	30	42
150	11	38
151	47	50
152	28	32
153	23	30
154	26	37
155	23	39
156	25	27
157	27	43
158	35	26
159	31	34
160	30	33
161	32	35
162	23	31
163	37	36
164	29	32
165	28	37
166	28	32
167	29	33
168	32	37
169	52	58
170	20	32
171	46	52
172	45	47
173	6	22
174	47	50
175	32	42
176	50	48
177	36	51
178	45	54
179	48	45
180	49	47
181	49	24
182	49	48
183	22	32
184	25	53
185	32	22
186	7	36
187	32	48
188	34	50
189	34	15
190	45	49
191	41	48
192	37	36
193	46	16
194	34	43
195	37	35
196	23	38
197	36	21
198	35	47
199	32	47
200	43	43

## Sheet: Cont_Intervention
ID	Group	Gender	Age	Grade	A1	A2	A3
1	1	F	21	F	18	19	22
2	1	F	19	F	28	30	26
3	1	F	19	F	29	26	30
4	1	M	19	F	42	40	46
5	1	F	21	F	26	30	31
6	1	F	20	F	40	37	36
7	1	M	19	F	68	60	42
8	1	F	19	F	32	32	38
9	1	F	18	F	34	28	29
10	1	M	20	F	37	26	36
11	1	F	20	F	29	34	33
12	1	F	19	F	33	26	30
13	1	M	20	F	31	33	22
14	1	F	20	F	39	44	46
15	1	F	20	F	29	26	30
16	1	M	20	F	37	40	36
17	1	F	20	F	49	47	50
18	1	M	19	F	32	29	33
19	1	F	19	F	30	29	27
20	1	F	20	F	30	27	31
21	1	M	22	SE	39	38	40
22	1	F	23	SE	39	37	38
23	1	M	23	SE	38	40	43
24	1	M	19	F	27	27	30
25	1	M	19	F	28	28	29
26	1	F	20	J	31	35	34
27	1	M	22	J	29	30	32
28	1	F	21	J	29	32	30
29	1	M	21	J	32	34	29
30	1	M	22	J	30	27	29
31	1	M	21	J	36	40	38
32	1	M	23	J	36	37	39
33	1	F	23	J	43	42	39
34	1	M	20	J	26	33	32
35	1	M	22	J	46	49	47
36	1	F	22	J	23	25	24
37	1	M	19	F	36	36	39
38	1	F	21	J	28	30	32
39	1	M	20	SO	36	39	36
40	1	F	23	SE	37	35	39
41	1	M	22	SE	40	38	36
42	1	F	24	SE	24	23	19
43	1	F	23	SE	25	26	27
44	1	M	21	J	35	38	39
45	1	M	24	J	46	39	48
46	1	M	22	J	29	30	28
47	1	F	22	J	20	26	22
48	1	M	22	SE	19	24	22
49	1	F	22	SO	33	33	29
50	1	M	20	SO	44	37	36
51	1	F	23	SE	26	30	28
52	1	M	21	J	39	37	40
53	1	M	20	SO	30	29	33
54	1	F	21	SO	28	29	30
55	1	M	21	J	62	59	60
56	1	F	21	SE	45	36	39
57	1	M	21	SE	58	60	61
58	1	F	22	SE	26	27	29
59	1	F	23	SE	34	36	37
60	1	M	23	SE	30	32	29
1	2	F	21	F	20	24	21
2	2	F	19	F	30	32	33
3	2	F	19	F	28	28	30
4	2	M	19	F	51	46	48
5	2	F	21	F	28	27	26
6	2	F	20	F	36	41	36
7	2	M	19	F	41	57	54
8	2	F	19	F	34	33	33
9	2	F	18	F	34	26	27
10	2	M	20	F	30	29	26
11	2	F	20	F	34	32	35
12	2	F	19	F	26	27	26
13	2	M	20	F	29	31	27
14	2	F	20	F	43	48	55
15	2	F	20	F	28	34	26
16	2	M	20	F	37	43	39
17	2	F	20	F	68	60	62
18	2	M	19	F	28	29	27
19	2	F	19	F	33	27	34
20	2	F	20	F	29	34	34
21	2	M	22	SE	49	45	46
22	2	F	23	SE	36	48	46
23	2	M	23	SE	37	36	40
24	2	M	19	F	30	29	31
25	2	M	19	F	31	31	34
26	2	F	20	J	29	32	31
27	2	M	22	J	35	34	32
28	2	F	21	J	28	30	31
29	2	M	21	J	33	32	35
30	2	M	22	J	27	26	30
31	2	M	21	J	36	40	38
32	2	M	23	J	35	37	40
33	2	F	21	J	42	38	40
34	2	M	21	J	31	32	34
35	2	M	22	J	38	40	39
36	2	F	22	J	21	24	23
37	2	M	19	F	36	36	39
38	2	F	21	J	28	30	32
39	2	M	20	SO	37	38	36
40	2	F	23	SE	37	37	39
41	2	M	22	SE	36	34	37
42	2	F	24	SE	21	21	22
43	2	F	23	SE	25	30	32
44	2	M	21	J	36	35	37
45	2	M	24	J	47	46	50
46	2	M	22	J	32	31	33
47	2	F	22	J	22	18	20
48	2	M	22	SE	24	24	23
49	2	F	21	SO	27	31	32
50	2	M	20	SO	37	37	36
51	2	F	23	SE	30	32	31
52	2	M	21	J	39	43	42
53	2	M	20	SO	34	31	33
54	2	F	20	SO	27	30	29
55	2	M	23	J	75	100	63
56	2	F	21	SE	38	43	39
57	2	M	21	SE	64	61	63
58	2	F	22	SE	28	26	31
59	2	F	23	SE	37	38	36
60	2	M	23	SE	30	31	32
