# Supplementary material for: Unveiling the mental state: validating the uBioMacpa Pro stress measurement tool among Chinese college students
Source: PeerJ. 2025 Aug 8;13:e19830. doi: 10.7717/peerj.19830 (PMC12338056; doi:10.7717/peerj.19830)
Supplement: Supplemental Information 2 [file peerj-13-19830-s002.xlsx]

## Sheet: Sheet1
ID	CSSCS	UBiomacpapro-stress	LF	HF	LF/HF	Mean BPM	SDNN	RMSSD
1	46	47	7.3	5.9	1.2	107.1	23	16.4
2	7	32	7.9	7.2	1.1	85.4	64.1	23.3
3	46	21	6	6.9	1	110.3	56.6	72.9
4	36	28	7.7	7.6	1	93.7	64.6	52.6
5	52	46	7.3	5.9	1.2	105.4	23	16.4
6	12	34	9.1	7.5	1.2	90.4	75.7	44
7	23	45	8.4	6.8	1.2	107.6	33.2	18.1
8	45	37	8.2	6.9	1.2	97.1	61.1	46.1
9	25	47	8.4	6.8	1.2	110.4	33.2	18.1
10	43	39	8.8	7.3	1.2	94.9	50.8	25.4
11	46	57	6.6	5.4	1.2	116.3	26.4	12.2
12	22	28	8.8	7.3	1.2	80.2	68.7	53.2
13	25	31	8.4	7.9	1.1	88.4	64.4	43.8
14	25	43	7.3	5.9	1.2	98.7	23	16.4
15	46	13	7.6	7.6	1	70	71.3	64.6
16	28	36	8.3	7.4	1.1	93.5	49	27.9
17	39	37	7.7	6.7	1.1	89.4	41.3	26.5
18	26	39	8.1	6.4	1.3	90.3	35.8	24.8
19	38	14	7.9	6	1.3	72	81.5	75.3
20	48	64	6.4	5.6	1.2	104.1	25.3	13.1
21	39	24	7.4	5.7	1.3	78	67.5	45.7
22	24	34	7.7	6.7	1.1	84.6	41.3	26.5
23	26	45	8.4	6.8	1.2	98.5	31.2	19.6
24	21	42	7.3	5.9	1.2	98.1	23	16.4
25	26	57	6.7	6.1	1.1	102.3	35.4	25.7
26	27	39	8.8	7.3	1.2	87.5	50.8	25.4
27	30	26	8.1	7.4	1.1	80.2	69.5	45.6
28	27	32	7.9	7.5	1	85.3	40	45.8
29	38	32	7.5	6.8	1.1	85.6	35.6	28.6
30	8	28	8.3	8	1	80.2	66.2	50.3
31	20	34	7.7	7.3	1	89.4	40.1	50.3
32	34	45	8.9	7.1	1.2	98.5	47.8	21.8
33	54	38	8.6	7.2	1.2	91.3	35.2	40.5
34	34	36	7.3	6.6	1.1	89.5	34.6	32.2
35	42	42	7.4	7.2	1	90.3	44.5	48.9
36	34	36	7.9	7.6	1	88.4	46.8	46.7
37	24	49	7	6.4	1.1	100	28.4	29.5
38	28	26	8.9	7.5	1.2	78.5	77.8	55.7
39	32	24	8.6	7.2	1.2	75.4	76.7	64.3
40	36	33	8.2	6.8	1.2	84.3	47.8	43.2
41	36	48	8.3	6.9	1.2	96.5	35.4	29.6
42	32	26	7.3	6.9	1.1	93.2	60.2	58.4
43	24	28	8.3	8	1	85.4	66.2	50.3
44	32	42	7.3	5.9	1.2	86.1	23	16.4
45	24	26	7.5	8.3	0.9	78.3	46.4	60.4
46	38	42	7.6	6.9	1.1	88.4	27	35
47	21	36	7.9	7.6	1	76.5	46.8	46.7
48	35	22	8.3	7.5	1.1	89.1	66.7	58.4
49	54	42	7.6	6.9	1.1	103.6	27	35
50	36	48	6.8	5.7	1.2	90.5	23.5	26.2
51	30	35	8.9	7.4	1.2	85	59.6	45.5
52	28	31	7.8	6.5	1.2	84.3	57.6	50.1
53	24	46	8.3	6.9	1.2	97.4	46.3	20.7
54	28	31	8.4	7.6	1.1	86.1	56.8	42.6
55	26	20	7.2	6.9	1	76.4	69.7	54.8
56	18	52	7	6.4	1.1	99.3	28.4	29.5
57	37	32	7.8	6.5	1.2	83.6	57.6	50.1
58	36	29	8	6.7	1.2	79.3	58.2	48.4
59	42	19	6.8	6.9	1	72.4	56.6	72.9
60	36	22	7.4	7.6	1	75	66.9	56.6
61	34	32	7.8	6.5	1.2	79.4	57.6	50.1
62	35	47	6.6	6	1.1	98.6	28.9	40.2
63	22	41	7.9	7.2	1.1	93.2	52.5	30.9
64	47	50	6.8	5.7	1.2	101.3	23.5	26.2
65	30	32	8.8	7.3	1.2	84.6	74.6	50.4
66	39	34	7.3	6.6	1.1	86.7	61	38.9
67	15	47	6.6	6	1.1	99.6	28.9	40.2
68	50	58	6.5	5.9	1.1	103.2	33.4	23.8
69	37	37	8.4	7	1.2	88.4	66.5	40.2
70	24	28	6.9	7.7	0.9	78.6	44.3	60.2
71	28	30	7.8	7.1	1.1	79.4	54.3	43.2
72	35	38	7.2	6.5	1.1	90.3	42.8	24.9
73	21	31	7.9	7.5	1	83.5	40	45.8
74	28	44	7.8	6	1.3	98.6	30.9	18.7
75	34	45	6.6	6	1.1	98.9	28.9	40.2
76	18	42	7.3	5.9	1.2	97.3	25	23.8
77	27	23	8	7.5	1.1	76.2	83.8	67.6
78	48	25	8.8	7.3	1.2	76	75.4	60.3
79	29	28	7.8	7.5	1	77.7	43.5	40.2
80	35	24	7.7	7.1	1.1	75.6	64.1	55.7
81	41	38	8.8	7.3	1.2	89.7	50.8	25.4
82	25	30	7.1	7.6	0.9	85.9	42.2	54.5
83	37	23	8	7.5	1.1	73.7	83.8	67.6
84	35	33	9.1	7.5	1.2	87.3	75.7	44
85	27	30	8.4	7.9	1.1	85.2	64.4	43.8
86	32	34	8.6	7.1	1.2	88.8	44.4	27.7
87	29	37	8.3	7.4	1.1	89	49	27.9
88	22	36	8	7.4	1.1	88.4	44.1	37.2
89	45	42	7.3	5.9	1.2	90	23	16.4
90	32	36	7.5	7.2	1	89.1	52.3	30.6
91	28	30	8	7.3	1.1	85.3	45.7	34.2
92	32	36	7.9	7.2	1.1	88.6	56.1	39.4
93	20	46	8.9	7.1	1.2	99.3	47.8	21.8
94	28	32	7.9	7.5	1	86.1	40	45.8
95	32	32	7.5	6.8	1.1	85.7	35.6	28.6
96	21	38	7.2	6.5	1.1	89.5	33.5	31.8
97	34	19	6.8	6.9	1	70	56.6	72.9
98	49	51	6.8	5.7	1.2	103.2	23.5	26.2
99	4	23	7.4	7.6	1	74.3	66.9	56.6
100	7	42	7.4	7.2	1	93.2	44.5	48.9
101	4	31	7.1	6.5	1.1	88.4	27.3	20.3
102	30	34	8.9	7.4	1.2	88.7	59.6	45.5
103	44	45	7.3	5.9	1.2	97.2	25	23.8
104	17	45	7.3	5.9	1.2	96.9	23	16.4
105	20	37	7.2	6.5	1.1	86.5	35	39.8
106	7	36	6.9	6.3	1.1	86.3	30.2	29.5
107	45	39	7.3	7.1	1	87.1	30	44.7
108	36	43	7.8	6	1.3	96.6	30.9	18.7
109	51	26	7.9	7.2	1.1	76.2	64.5	44.2
110	20	34	8.8	7.3	1.2	86.7	74.6	50.4
111	29	35	8.7	7.3	1.2	88.6	44.4	27.6
112	32	45	8.3	6.9	1.2	93.5	46.3	20.7
113	38	38	7.1	7	1	89.4	45.3	34.8
114	21	27	7.9	7.2	1.1	78.3	64.5	44.2
115	46	50	6.8	5.7	1.2	99.4	23.5	26.2
116	20	37	7.3	6.6	1.1	90.1	34.6	32.2
117	37	34	7.7	7.3	1	88.3	40.1	50.3
118	27	37	8.8	7.3	1.2	89.9	50.8	25.4
119	31	39	8.8	7.3	1.2	90.3	50.8	25.4
120	45	39	8.1	6.4	1.3	90	35.8	24.8
121	42	32	7.9	7.2	1.1	86.3	64.1	23.3
122	6	32	7.3	6.6	1.1	85.3	61	38.9
123	5	19	6.8	6.9	1	76.4	65.3	74.7
124	22	36	8	7.4	1.1	87.2	44.1	37.2
125	29	37	7.5	7.2	1	88.6	52.3	30.6
126	19	39	8.4	7	1.2	90.2	33.1	38.7
127	31	38	7.2	6.5	1.1	89.8	33.5	31.8
128	26	41	7.2	6.5	1.1	97.3	40.8	24.2
129	46	50	7.3	5.9	1.2	99.3	23	16.4
130	6	33	7.3	6.6	1.1	85.8	61	38.9
131	28	34	7.7	7.5	1	89.3	44.2	52.3
132	20	32	7.9	7.5	1	87.5	40	45.8
133	36	32	9.1	7.6	1.2	87.4	64.5	36.7
134	39	39	8.2	6.8	1.2	88.7	43.2	39.7
135	33	43	7.3	5.9	1.2	94.8	23	16.4
136	18	47	7.3	6.6	1.1	95.3	29.1	32.4
137	22	34	7.7	7.3	1	86	40.1	50.3
138	27	33	7.7	7.5	1	86.3	44.2	52.3
139	23	43	7.3	5.9	1.2	95.7	23	16.4
140	40	45	8.9	7.1	1.2	96.8	47.8	21.8
141	35	44	7.6	6.9	1.1	97.3	27	35
142	47	43	7.3	5.9	1.2	97	23	16.4
143	38	25	8	7.6	1.1	79.4	76.5	48.4
144	47	51	7	6.4	1.1	99.6	27.4	29.5
145	32	35	7.9	7.5	1	83.8	43.2	41.8
146	6	34	7.6	7.4	1	82.8	40.2	51.3
147	27	35	7.2	6.5	1.1	84.3	35	39.8
148	34	37	8.2	6.8	1.2	86.5	43.2	39.7
149	30	42	6.4	5.6	1.2	91.6	26.4	12.2
150	11	38	7.9	7.6	1	89.4	54.2	35.2
151	47	50	6.6	5.5	1.2	94.3	25.2	12.1
152	28	32	8.58	7.8	1.1	87.4	47	59.1
153	23	30	7.6	7.6	1	86.8	69.2	35.6
154	26	37	7.68	6.4	1.2	92.5	45.7	35.3
155	23	39	6.71	6.1	1.1	89	30	29.2
156	25	27	8.47	7.7	1.1	81.3	58.4	46.1
157	27	43	8.28	6.9	1.2	93	42.4	32.6
158	35	26	8.3	7.5	1.1	86.2	50.4	41.8
159	31	34	7.4	7.3	1	87.9	40.8	52.3
160	30	33	7.8	7.1	1.1	86.7	40.6	50.3
161	32	35	8	6.7	1.2	87.5	60.7	39.4
162	23	31	8.8	7.3	1.2	85.4	69.3	51.4
163	37	36	7.5	6.8	1.1	89.6	42.3	31.2
164	29	32	7.5	7.4	1	88.5	40.1	52.3
165	28	37	6.9	6.3	1.1	89.8	36	34.5
166	28	32	8.14	7.4	1.1	84.2	52.3	35.6
167	29	33	7.81	7.1	1.1	84.3	40.6	50.3
168	32	37	7.8	6.5	1.2	85.7	58.3	39.2
169	52	58	6.6	5.5	1.2	106.8	25.2	12.1
170	20	32	7.4	7.3	1	70	40.8	52.3
171	46	52	7.7	7	1.1	109.2	29.5	35.8
172	45	47	7.59	6.9	1.1	101.8	35.3	36.3
173	6	22	7.2	7	1	81.5	60.3	58.7
174	47	50	8.71	6.7	1.3	101.8	35.3	27.4
175	32	42	8.4	7	1.2	98.9	52.3	35.6
176	50	48	8.4	7	1.2	98.8	45.3	23.6
177	36	51	7.9	6.6	1.2	99.4	34.2	19.4
178	45	54	6.24	5.2	1.2	106.3	20.7	12
179	48	45	8.4	7	1.2	101.8	20.5	21.9
180	49	47	8.64	7.2	1.2	102.4	20.2	19.7
181	49	24	7.7	5.9	1.3	78.5	75.6	64.5
182	49	48	7.8	7	1.1	99.6	26.7	21.5
183	22	32	7.5	7.4	1	81.7	40.1	52.3
184	25	53	7.9	6.6	1.2	99.8	34.2	19.4
185	32	22	7.6	7.3	1	75.7	64.3	55.7
186	7	36	6.9	6.3	1.1	87.3	30.4	37.8
187	32	48	8.64	7.2	1.2	98.4	20.2	19.7
188	34	50	7.7	7	1.1	99.5	29.5	35.8
189	34	15	7.6	7.3	1	80.5	64.3	55.7
190	45	49	8.4	7	1.2	106.2	45.3	23.6
191	41	48	7.37	6.7	1.1	103.6	29.5	32.5
192	37	36	7.48	6.8	1.1	87.5	34.5	26.7
193	46	16	7.6	7.4	1	74.1	71.4	75.3
194	34	43	8.28	6.9	1.2	99.7	45.4	29.8
195	37	35	7.4	7.2	1	87.3	42.3	39.2
196	23	38	6.71	6.1	1.1	88.5	30	29.2
197	36	21	7.2	7	1	76.4	60.3	58.7
198	35	47	7.37	6.7	1.1	100.6	29.5	32.5
199	32	47	8.4	7	1.2	105.2	45.3	23.6
200	43	43	8.5	7.1	1.2	102.3	46.7	24.8
