# Supplementary material for: Unveiling the mental state: validating the uBioMacpa Pro stress measurement tool among Chinese college students
Source: PeerJ. 2025 Aug 8;13:e19830. doi: 10.7717/peerj.19830 (PMC12338056; doi:10.7717/peerj.19830)
Supplement: Supplemental Information 3 [file peerj-13-19830-s003.xlsx]

## Sheet: Sheet1
ID	Gender	Age	Grade	A1-stress	A1-LF	A1-HF	A1-LF/HF	A1-Mean BPM	A1-SDNN	A1-RMSSD	A2-stress	A2-LF	A2-HF	A2-LF/HF	A2-Mean BPM	A2-SDNN	A2-RMSSD	A3-stress	A3-LF	A3-HF	A3-LF/HF	A3-Mean BPM	A3-SDNN	A3-RMSSD
1	F	21	F	18	7.6	7.6	1	78.5	70	59.6	19	6.8	6.9	1	74.6	56.6	72.9	22	7.4	7.6	1	80.1	66.9	56.6
2	F	19	F	28	9	8	1.1	85	68.6	43.2	30	8.2	7.6	1.1	86.1	44.4	40.5	26	8.9	7.5	1.2	82.4	77.8	55.7
3	F	19	F	29	6.9	7.6	0.9	80.2	42.2	54.5	26	7.5	8.3	0.9	84.2	46.4	60.4	30	8.3	8.1	1	88.3	43.2	56.7
4	M	19	F	42	7.3	5.9	1.2	112.3	23	16.4	40	8.4	7.6	1.1	103.2	32.4	25.1	46	9	7.5	1.2	111.7	30.5	25
5	F	21	F	26	7.7	7.1	1.1	77.1	64.1	55.7	30	8	6.7	1.2	80.4	58.2	48.4	31	7.8	6.5	1.2	82.3	57.6	50.1
6	F	20	F	40	8.4	6.8	1.2	92.3	33.2	18.1	37	8	7.4	1.1	90.1	44.1	37.2	36	7.9	7.6	1	88	46.8	46.7
7	M	19	F	68	6.4	5.6	1.2	124.2	26.4	12.2	60	6.6	6	1.1	115.3	35.4	30.4	42	7.4	7.2	1	107.2	44.5	48.9
8	F	19	F	32	7.2	6.4	1.1	94	27.1	19.7	32	7.1	6.5	1.1	95.1	27.3	20.3	38	7.7	6.4	1.2	97.4	22.5	20.1
9	F	18	F	34	8.7	7.3	1.2	90.3	44.4	27.6	28	8.1	7.7	1	86.7	46.5	35.1	29	7.9	7.4	1	87.9	45.1	33.4
10	M	20	F	37	8.8	7.3	1.2	94.9	50.8	25.4	26	6.8	7.5	0.9	88.4	55.4	30.8	36	7.5	7.2	1	96.1	52.3	30.6
11	F	20	F	29	6.9	7.6	0.9	80.2	42.2	54.6	34	7.7	7.3	1	98.8	40.1	50.3	33	7.7	7.5	1	96.8	44.2	52.3
12	F	19	F	33	8.6	7.1	1.2	97.8	44.4	27.7	26	8.6	7.8	1.1	95.1	50.1	39.3	30	8	7.3	1.1	98.3	45.7	34.2
13	M	20	F	31	8.4	7.9	1.1	85.3	64.4	43.8	33	8.9	7.4	1.2	87.4	59.3	40.5	22	8.3	7.5	1.1	82.1	66.7	58.4
14	F	20	F	39	8.8	7.3	1.2	101.2	50.8	25.4	44	8.9	7.1	1.2	108.3	47.8	21.8	46	8.3	6.9	1.2	111.3	46.3	20.7
15	F	20	F	29	7.1	7.6	0.9	90.2	42.2	54.5	26	7	7.8	0.9	88.3	49.4	60.2	30	7.2	7.6	1	90.5	45.6	54.9
16	M	20	F	37	8.3	7.4	1.1	98.9	49	27.9	40	8.4	7	1.2	101.6	45.4	24.8	36	7.9	7.2	1.1	99.8	56.1	39.4
17	F	20	F	49	7.3	5.9	1.2	107.3	23	16.4	47	7.3	6.6	1.1	100.2	29.1	32.4	50	7	6.4	1.1	105.7	28.4	29.5
18	M	19	F	32	7.9	7.2	1.1	89.6	64.1	23.3	29	7.2	6.9	1	87.4	66	43.1	33	7.3	6.6	1.1	90.1	61	38.9
19	F	19	F	30	6.9	7.6	0.9	85.4	42.2	54.5	29	7.8	7.5	1	85.1	44.5	66.1	27	7.9	7.7	1	84.3	51.2	68.4
20	F	20	F	30	8.4	7.9	1.1	83.5	64.4	43.8	27	8.3	8	1	85.3	66.2	50.3	31	8.4	7.6	1.1	89.2	56.8	42.6
21	M	22	SE	39	8.9	7	1.3	98.5	20.8	12.4	38	8.6	7.2	1.2	97.9	35.2	40.5	40	8.4	7	1.2	98.4	33.1	38.7
22	F	23	SE	39	7.1	6	1.2	94.7	23.5	17.9	37	7.3	6.6	1.1	90.1	34.6	32.2	38	7.2	6.5	1.1	95.1	33.5	31.8
23	M	23	SE	38	8.1	6.4	1.3	96.3	35.8	24.8	40	8.1	6.2	1.3	99.3	32.7	20.1	43	7.8	6	1.3	98.8	30.9	18.7
24	M	19	F	27	7.7	7.1	1.1	85.2	64.1	55.7	27	7.3	6.9	1.1	86.8	60.2	58.4	30	7.5	6.8	1.1	90.3	56.2	55.4
25	M	19	F	28	8.4	7.1	1.2	83.9	50.6	40.1	28	8.5	7.2	1.2	81	49.1	42.3	29	8.5	7.1	1.2	80.4	48.4	40.7
26	F	20	J	31	8.4	7.9	1.1	88.5	64.4	43.8	35	8.9	7.4	1.2	90.2	59.6	45.5	34	8.3	7.5	1.1	94.2	61.3	54.8
27	M	22	J	29	7.9	7.2	1.1	90.2	36.8	29.9	30	7.7	7	1.1	92.1	37.4	30.8	32	7.5	6.8	1.1	95.6	35.6	28.6
28	F	21	J	29	6.9	7.6	0.9	87.4	42.2	54.5	32	7.9	7.5	1	88	40	45.8	30	7.8	7.7	1	89.1	45.3	54.6
29	M	21	J	32	7.9	7.2	1.1	95.1	36	23.3	34	7.8	7	1.1	96.5	35	25.3	29	7.6	7.4	1	92.2	43.1	42.3
30	M	22	J	30	7.9	7.2	1.1	90.4	36.8	29.9	27	7.8	7.5	1	89.3	43.5	40.2	29	7.6	7.3	1	90.1	42.8	38.3
31	M	21	J	36	7.7	6.7	1.1	93.7	41.3	26.5	40	7.2	6.5	1.1	104	40.8	24.2	38	7.1	7	1	99.5	45.3	34.8
32	M	23	J	36	8.2	6.6	1.2	95.4	61.8	35.6	37	7.6	6.3	1.2	96.1	55.6	35.4	39	7.3	6.1	1.2	97.8	53.4	34.7
33	F	23	J	43	7.3	5.9	1.2	103.2	23	16.4	42	7.6	6.9	1.1	100	27	35	39	7.3	7.1	1	98.4	30	44.7
34	M	20	J	26	8.9	7.5	1.2	84.6	77.8	55.7	33	8.5	7.1	1.2	92.3	65.6	50.4	32	8	7.3	1.1	95.2	66.5	55.4
35	M	22	J	46	7.3	5.9	1.2	110.3	23	16.4	49	6.8	5.7	1.2	112	23.5	26.2	47	6.6	6	1.1	107.7	28.9	40.2
36	F	22	J	23	8	7.5	1.1	82.6	83.8	67.6	25	8.8	7.3	1.2	78	75.4	60.3	24	8.6	7.2	1.2	76.8	76.7	64.3
37	M	19	F	36	7.7	6.7	1.1	93.7	41.3	26.5	36	7.5	6.8	1.1	93	42.5	27.5	39	8	6.7	1.2	99.4	41.8	25.6
38	F	21	J	28	8.4	7.1	1.2	78.3	50.6	40.1	30	8.4	7	1.2	80.4	49.7	41.5	32	8.2	6.8	1.2	88.2	47.8	43.2
39	M	20	SO	36	8.5	7.5	1.1	95.3	38.8	27.1	39	8	7.3	1.1	97	36.7	29.3	36	7.9	7.5	1	95.3	43.2	41.8
40	F	23	SE	37	8.2	6.9	1.2	97.1	61.1	46.1	35	7.7	7	1.1	94.3	64.3	55.2	39	8.3	6.9	1.2	90.2	58.7	52.9
41	M	22	SE	40	8.1	6.4	1.3	102.5	35.8	24.8	38	8.2	6.8	1.2	99.6	43.2	39.7	36	7.8	7	1.1	97.3	45.4	46.5
42	F	24	SE	24	7.4	5.7	1.3	83.6	67.5	45.7	23	7.7	6.4	1.2	78.4	68.8	50.3	19	7.2	6.9	1	76.8	69.7	54.8
43	F	23	SE	25	8	7.6	1.1	85.1	76.5	48.4	26	8.1	7.4	1.1	89.1	69.5	45.6	27	7.9	7.2	1.1	76.1	64.5	44.2
44	M	21	J	35	7.7	6.7	1.1	96.8	41.3	26.5	38	7.2	6.5	1.1	95.4	42.8	24.9	39	7.4	6.7	1.1	99.7	42.5	27.6
45	M	24	J	46	8.4	6.8	1.2	92.3	33.2	18.1	39	7.7	7	1.1	95.6	43.7	32.5	48	8.3	6.9	1.2	101.4	35.4	29.6
46	M	22	J	29	6.9	7.6	0.9	85	42.2	54.5	30	6.9	7.7	0.9	82.2	49.4	56.4	28	7.1	7.9	0.9	96.3	54.3	57.8
47	F	22	J	20	6	6.9	1	79.6	56.6	72.9	26	7.4	7.2	1	79.1	60.1	75.4	22	7.7	7.4	1	75.6	66.3	79.4
48	M	22	SE	19	7.9	6	1.3	79.8	81.5	69.4	24	7.6	6.9	1.1	76.2	82.5	71.2	22	7.8	7.1	1.1	73.6	84.6	73.4
49	F	22	SO	33	9.1	7.5	1.2	82.9	75.7	44	33	8.8	7.3	1.2	85	74.6	50.4	29	8.3	7.5	1.1	81.2	76.4	56.8
50	M	20	SO	44	7.3	5.9	1.2	116.1	25	23.8	37	7.2	6.5	1.1	104.6	35	39.8	36	7.5	6.8	1.1	101.5	38.8	45.3
51	F	23	SE	26	8.9	7.5	1.2	77.1	77.8	55.7	30	8.6	7.2	1.2	89.1	69.3	50.2	28	8.1	7.4	1.1	86.2	73.4	55.8
52	M	21	J	39	8.8	7.3	1.2	94.9	50.8	25.4	37	8.3	7.5	1.1	89.6	55.4	35.6	40	7.9	7.2	1.1	95.7	52.5	30.9
53	M	20	SO	30	6.9	7.6	0.9	95.3	42.2	54.5	29	6.9	7.7	0.9	88.4	44.3	60.2	33	7.6	7.4	1	88.1	40.2	51.3
54	F	21	SO	28	7.7	7.6	1	84.3	64.6	52.6	29	8.14	7.4	1.1	83.5	60.4	45.8	30	7.8	7.1	1.1	84.6	54.3	43.2
55	M	21	J	62	6.4	5.6	1.2	114.3	25.3	13.1	59	6.7	6.1	1.1	109	35.4	25.7	60	6.5	5.9	1.1	112.6	33.4	23.8
56	F	21	SE	45	7.3	5.9	1.2	109	23	16.4	36	6.9	6.3	1.1	101.1	30.2	29.5	39	6.8	6.2	1.1	98.7	30.1	25.7
57	M	21	SE	58	6.6	5.4	1.2	96	26.4	12.2	60	6.2	5.2	1.2	106	25.9	12.7	61	6	5	1.2	113.2	24.3	11.9
58	F	22	SE	26	8.9	7.5	1.2	73	77.8	55.7	27	8.8	7.3	1.2	75	68.7	53.2	29	8.5	7.1	1.2	78.3	65.4	50.8
59	F	23	SE	34	9.1	7.5	1.2	98.4	75.7	44	36	8.5	7.1	1.2	100.2	70.4	42.5	37	8.4	7	1.2	99.4	66.5	40.2
60	M	23	SE	30	9	8	1.1	95.1	68.6	43.2	32	9.1	7.6	1.2	97.4	64.5	36.7	29	8.6	7.8	1.1	95.3	66.5	42.4
