# Supplementary material for: Unveiling the mental state: validating the uBioMacpa Pro stress measurement tool among Chinese college students
Source: PeerJ. 2025 Aug 8;13:e19830. doi: 10.7717/peerj.19830 (PMC12338056; doi:10.7717/peerj.19830)
Supplement: Supplemental Information 4 [file peerj-13-19830-s004.xlsx]

## Sheet: Sheet1
ID	Gender	Age	Grade	B1-stress	B1-LF	B1-HF	B1-LF/HF	B1-Mean BPM	B1-SDNN	B1-RMSSD	B2-stress	B2-LF	B2-HF	B2-LF/HF	B2-Mean BPM	B2-SDNN	B2-RMSSD	B3-stress	B3-LF	B3-HF	B3-LF/HF	B3-Mean BPM	B3-SDNN	B3-RMSSD
1	F	21	F	20	7.6	7.3	1	82.7	64.3	55.7	24	7.8	7.1	1.1	76.7	58.3	54.2	21	7.2	7	1	79.4	60.3	58.7
2	F	19	F	30	8.1	7.6	1.1	86	45.6	44.3	32	8.1	7.4	1.1	88.4	44.3	42.1	33	7.92	7.2	1.1	85.7	40.4	41.3
3	F	19	F	28	7.5	7.4	1	84.3	43.5	53.6	28	7.4	7.3	1	87.3	56.1	54.5	30	7.1	7.1	1	88.1	55.8	53.2
4	M	19	F	51	7.9	6.6	1.2	109	34.2	19.4	46	8.2	6.8	1.2	111.5	37.4	28.5	48	8.71	6.7	1.3	113.6	35.3	27.4
5	F	21	F	28	7.8	7	1.1	78.4	60.7	52.8	27	8.03	7.3	1.1	78.6	64.3	62.1	26	7.92	7.2	1.1	79.6	66.4	67.5
6	F	20	F	36	7.9	7	1.1	91.7	44.5	35.6	41	8.28	6.9	1.2	97.1	42.4	32.6	36	7.81	7.1	1.1	87.8	45.6	50.2
7	M	19	F	41	6.4	5.6	1.2	110.6	26.4	12.2	57	6.6	5.5	1.2	112.7	25.2	12.1	54	6.27	5.7	1.1	114.3	45.2	32.5
8	F	19	F	34	6.9	6.3	1.1	95.7	30.4	37.8	33	7.04	6.4	1.1	95.7	34.6	39.7	33	6.82	6.2	1.1	92.5	36.5	41.2
9	F	18	F	34	8.3	7.5	1.1	92.8	48.7	50.6	26	7.7	7.7	1	84.6	56.3	57.3	27	8.25	7.5	1.1	88.9	55.2	54.4
10	M	20	F	30	8.3	7.5	1.1	89.3	56.7	37.8	29	8.47	7.7	1.1	92.3	60.2	55.3	26	8.58	7.8	1.1	96.1	66.3	59.4
11	F	20	F	34	7.9	7.7	1	82.5	45.6	58.7	32	8.58	7.8	1.1	96.4	47	59.1	35	9	7.5	1.2	97.6	43	56.3
12	F	19	F	26	8.3	7.5	1.1	98.6	50.4	41.8	27	8.03	7.3	1.1	96.3	51.3	42.4	26	8.52	7.1	1.2	91.5	45.2	41.5
13	M	20	F	29	8.1	7.4	1.1	85.4	55.3	37.5	31	8.14	7.4	1.1	86.7	52.3	35.6	27	8.47	7.7	1.1	82.1	58.4	46.1
14	F	20	F	43	8.5	7.1	1.2	104.1	46.7	24.8	48	8.4	7	1.2	111.6	45.3	23.6	55	8.16	6.8	1.2	115.8	44.2	34.2
15	F	20	F	28	7.7	7.5	1	90.5	45.7	58.3	34	8.03	7.3	1.1	96.4	42.4	55.4	26	7.7	7.6	1	92.8	45.6	56.8
16	M	20	F	37	7.9	7.6	1	98.5	54.2	35.2	43	8.03	7.3	1.1	101.6	50.1	34.2	39	8.14	7.4	1.1	99.8	55.6	38.4
17	F	20	F	68	6.4	5.6	1.2	114.5	25.6	15.8	60	6.27	5.7	1.1	116.3	29.3	18.9	62	6.6	5.5	1.2	109.6	27.6	15.7
18	M	19	F	28	7.8	7.5	1	86.3	68.6	32.5	29	7.6	7.6	1	87.6	69.2	35.6	27	7.9	7.8	1	90.3	71.2	54.3
19	F	19	F	33	7.4	7.3	1	90.1	40.8	52.3	27	6.75	7.5	0.9	83.6	56	59.3	34	7.5	7.3	1	88.7	54.3	58.4
20	F	20	F	29	8.1	7.9	1	82.4	66.7	55.2	34	8.47	7.7	1.1	88.9	62.5	52.6	34	8.14	7.4	1.1	90.3	61.9	53
21	M	22	SE	49	8.8	6.8	1.3	105.2	19.4	12.2	45	8.4	7	1.2	100.5	20.5	21.9	46	8.64	7.2	1.2	99.8	20.2	19.7
22	F	23	SE	36	7.6	6.9	1.1	93.2	31.4	35.2	48	7.37	6.7	1.1	104.3	29.5	32.5	46	7.59	6.9	1.1	95.1	35.3	36.3
23	M	23	SE	37	7.9	6.6	1.2	95.6	43.2	33.5	36	7.68	6.4	1.2	95.3	45.7	35.3	40	7.44	6.2	1.2	96.6	43.4	36.7
24	M	19	F	30	7.5	7.3	1	88.4	66.3	58.7	29	7.92	7.2	1.1	89.1	65.6	59.3	31	8.52	7.1	1.2	90.6	63.4	56.7
25	M	19	F	31	7.8	7	1.1	81.9	60.3	53.6	31	8.03	7.3	1.1	84.5	62.3	56.7	34	7.81	7.1	1.1	85.8	61.9	55.4
26	F	20	J	29	8.7	7.3	1.2	88.2	50.3	38.6	32	8.64	7.2	1.2	87.8	45.6	37.5	31	8.03	7.3	1.1	91.6	48.3	38.5
27	M	22	J	35	7.8	7	1.1	94.1	35.7	28.4	34	7.48	6.8	1.1	94.3	34.5	26.7	32	7.81	7.1	1.1	95.6	37.1	34.2
28	F	21	J	28	6.9	7.7	0.9	86.3	45.6	57.3	30	7.3	7.3	1	90.2	43.2	55.3	31	7.2	7.2	1	89.2	44.6	56.2
29	M	21	J	33	7.8	7.1	1.1	95.6	40.6	50.3	32	7.81	7.1	1.1	95.3	40.6	50.3	35	7.7	7	1.1	94.5	41	49.2
30	M	22	J	27	7.5	7.3	1	88.9	40.5	38.6	26	7.2	7.2	1	89.5	42.3	47.4	30	7.1	7.1	1	91.3	39.5	45.6
31	M	21	J	36	7.5	6.8	1.1	92.8	44.2	27.8	40	7.15	6.5	1.1	103.6	43.2	26.5	38	7.59	6.9	1.1	99.6	46.5	35.4
32	M	23	J	35	8	6.7	1.2	93.7	60.7	39.4	37	7.8	6.5	1.2	96.5	58.3	39.2	40	7.68	6.4	1.2	97.9	56.1	37.5
33	F	21	J	42	6.8	6	1.1	101.3	26	20.1	38	6.71	6.1	1.1	98.4	30	29.2	40	6.6	6	1.1	98.7	29.4	30.4
34	M	21	J	31	8.8	7.3	1.2	90.2	69.3	51.4	32	8.25	7.5	1.1	92.1	60.1	50.3	34	8.76	7.3	1.2	96.3	56.7	45.6
35	M	22	J	38	7	6.4	1.1	99.8	45	38.6	40	6.93	6.3	1.1	112	43.5	35.5	39	7.15	6.5	1.1	100.4	44.6	36.7
36	F	22	J	21	8	7.3	1.1	85.4	85.4	70.1	24	7.92	7.2	1.1	77.3	80.2	64.3	23	8.25	7.5	1.1	76.5	84.4	71.5
37	M	19	F	36	7.5	6.8	1.1	93.5	42.3	31.2	36	7.48	6.8	1.1	93	42.9	36.2	39	7.15	6.5	1.1	99.1	41.7	33.7
38	F	21	J	28	8.6	7.2	1.2	78.5	52.3	44.3	30	7.81	7.1	1.1	80.6	50.8	41.1	32	7.7	7	1.1	88.5	45.8	37.8
39	M	20	SO	37	7.9	7.2	1.1	96.7	41.3	32.5	38	8.52	7.1	1.2	95.3	40.1	32.1	36	8.52	7.1	1.2	95.6	40.1	32.1
40	F	23	SE	37	7.8	7.1	1.1	97.1	62.5	50.3	37	8.03	7.3	1.1	95.2	58.9	55.7	39	7.81	7.1	1.1	90.1	54.5	53.5
41	M	22	SE	36	7.9	6.6	1.2	98.7	41.3	34.7	34	8.04	6.7	1.2	93.5	46.7	47.9	37	7.92	6.6	1.2	97.3	46.3	47.4
42	F	24	SE	21	8	6.7	1.2	78.6	74.1	54.3	21	7.59	6.9	1.1	76.3	70.8	60.2	22	6.9	6.9	1	77.2	65.4	57.5
43	F	23	SE	25	8.3	7.5	1.1	85.3	74.3	50.3	30	9.12	7.6	1.2	91.5	70.2	52.1	32	8.14	7.4	1.1	80.3	68.4	50.3
44	M	21	J	36	7.5	6.8	1.1	98.6	44.3	36.3	35	7.4	7.2	1	94.7	42.3	39.2	37	7.81	7.1	1.1	94.3	40.5	39.1
45	M	24	J	47	7.8	7	1.1	99.7	26.7	21.5	46	7.92	7.2	1.1	95.6	31.2	38.4	50	7.7	7	1.1	105.3	29.5	35.8
46	M	22	J	32	7.5	7.4	1	82.4	40.1	52.3	31	7.3	7.3	1	82.9	39.4	49.6	33	7.1	7.1	1	97.4	36.7	46.4
47	F	22	J	22	7.1	7	1	83.5	64.2	73.2	18	7.6	7.4	1	75.3	71.4	75.3	20	7.2	7.2	1	75.1	69.5	72.7
48	M	22	SE	24	7.7	5.9	1.3	85.6	75.6	64.5	24	7.44	6.2	1.2	76.1	73.5	63.6	23	7.15	6.5	1.1	73.8	74.1	65.5
49	F	21	SO	27	8.5	7.7	1.1	78.6	76.8	50.3	31	8.4	7	1.2	84.9	69.3	55.3	32	8.28	6.9	1.2	85.6	65.5	53.8
50	M	20	SO	37	6.9	6.3	1.1	110.3	36	34.5	37	6.71	6.1	1.1	104.2	39	38.4	36	6.93	6.3	1.1	101	40	38.2
51	F	23	SE	30	8.8	7.3	1.2	78.5	73.4	53.2	32	8.52	7.1	1.2	89.4	72.1	50.2	31	7.92	7.2	1.1	88.3	69.3	56.4
52	M	21	J	39	8.5	7.1	1.2	94.5	48.3	30.5	43	8.28	6.9	1.2	99.7	45.4	29.8	42	8.4	7	1.2	96.3	52.3	35.6
53	M	20	SO	34	7.8	7.7	1	90.2	44.5	61.4	31	7.02	7.8	0.9	89.8	50.3	62.3	33	7.7	7.7	1	88	52.6	60.1
54	F	20	SO	27	7.7	7.5	1	85.2	63.4	54.5	30	7.92	7.2	1.1	84.6	60.3	52.4	29	8.14	7.4	1.1	84.3	64.7	57.8
55	M	23	J	75	6.4	5.3	1.2	116.1	22.3	12.1	100	6.12	5.1	1.2	112.7	18.2	10.3	63	6.38	5.8	1.1	112.8	22.4	21.8
56	F	21	SE	38	7	6.4	1.1	100.6	40.4	32.6	43	6.82	6.2	1.1	106.1	35.4	31.7	39	6.9	6.7	1	98.5	48	39.5
57	M	21	SE	64	6.4	5.3	1.2	101.2	21.4	11.8	61	6.24	5.2	1.2	108.3	20.7	12	63	6.12	5.1	1.2	114.4	19.8	11.9
58	F	22	SE	28	8	7.3	1.1	78	72.3	60.4	26	7.92	7.2	1.1	74.6	69.5	59.8	31	8.52	7.1	1.2	78.6	66.3	55.4
59	F	23	SE	37	8.8	7.3	1.2	98.7	73.4	42	38	8.64	7.2	1.2	105.5	71.7	56.3	36	8.14	7.4	1.1	99.6	73.2	60.3
60	M	23	SE	30	7.8	7.4	1	95.4	65.3	45.6	31	7.2	7.2	1	86.4	61.2	44.3	32	7.7	7	1.1	97.3	58.6	40.1
